# Supplementary material for: Occupational health outcomes among international migrant workers: a systematic review and meta-analysis
Source: PubMed Central journal article supplement (PMC6565984; doi:10.1016/s2214-109x(19)30204-9), 2019-05-20
Supplement: mmc1.pdf [file mmc1.pdf]

# THE LANCET

## Global Health

### Supplementary appendix

This appendix formed part of the original submission and has been peer reviewed. We post it as supplied by the authors.

Supplement to: Hargreaves S, Rustage K, Nellums LB, et al. Occupational health outcomes among international migrant workers: a systematic review and meta-analysis. *Lancet Glob Health* 2019; published online May 20. [http://dx.doi.org/10.1016/S2214-109X\(19\)30204-9](http://dx.doi.org/10.1016/S2214-109X(19)30204-9).

## Appendix

### ***Occupational health outcomes among international migrant workers: a systematic review and meta-analysis***

*Hargreaves S\*, Rustage K\*, Nellums LB\*, McAlpine A, Pocock N, Devakumar D, Aldridge RW, Abubakar I, Kristensen KL, Himmels JW, Friedland JS, Zimmerman C*

*\*Joint first authors*

Section of Infectious Diseases and Immunity, Imperial College London; and The Institute for Infection and Immunity, St George's, University of London, London, UK (Hargreaves S FRCPE, Rustage K MSc, Nellums LB PhD; JW Himmels MD, Friedland JS FMedSci); Department of Global Health and Development, London School of Hygiene & Tropical Medicine (McAlpine A PhD); United Nations University, Kuala Lumpur, Malaysia (Pocock N PhD); UCL Institute for Global Health, London (Devakumar D PhD, Abubakar I FRCP); UCL Institute for Health Informatics, London (Aldridge R PhD); Danish Research Centre for Migration, Ethnicity and Health, University of Copenhagen (Kristensen KL); Gender, Violence and Health Centre, London School of Hygiene & Tropical Medicine, London (Zimmerman C PhD).

*Correspondence to: Dr Sally Hargreaves*

*Section of Infectious Diseases and Immunity, Imperial College London; and The Institute for Infection and Immunity, St George's, University of London, London, UK*

*[s.hargreaves@sgul.ac.uk](mailto:s.hargreaves@sgul.ac.uk); [s.hargreaves@imperial.ac.uk](mailto:s.hargreaves@imperial.ac.uk)*

## Prevalence of Morbidity Among International Migrants Employed In Agriculture

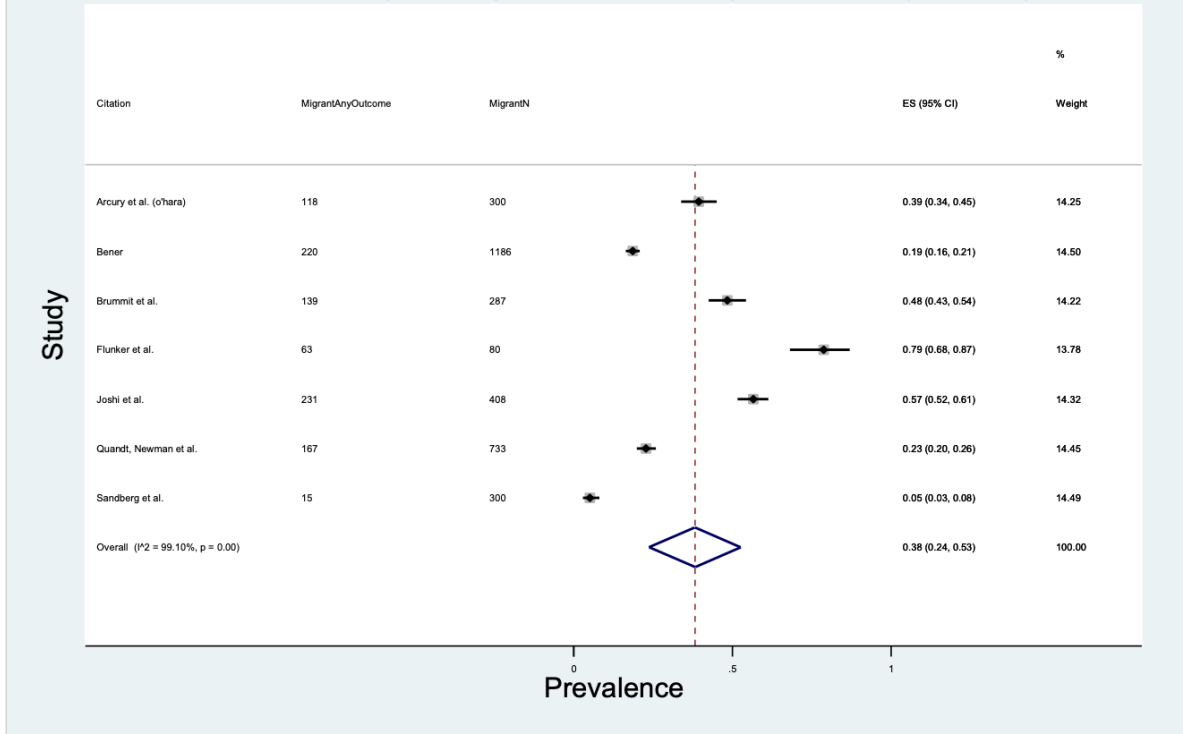

Supplementary Figure 1. Forest plot: Prevalence of morbidity among international migrant workers employed in agriculture

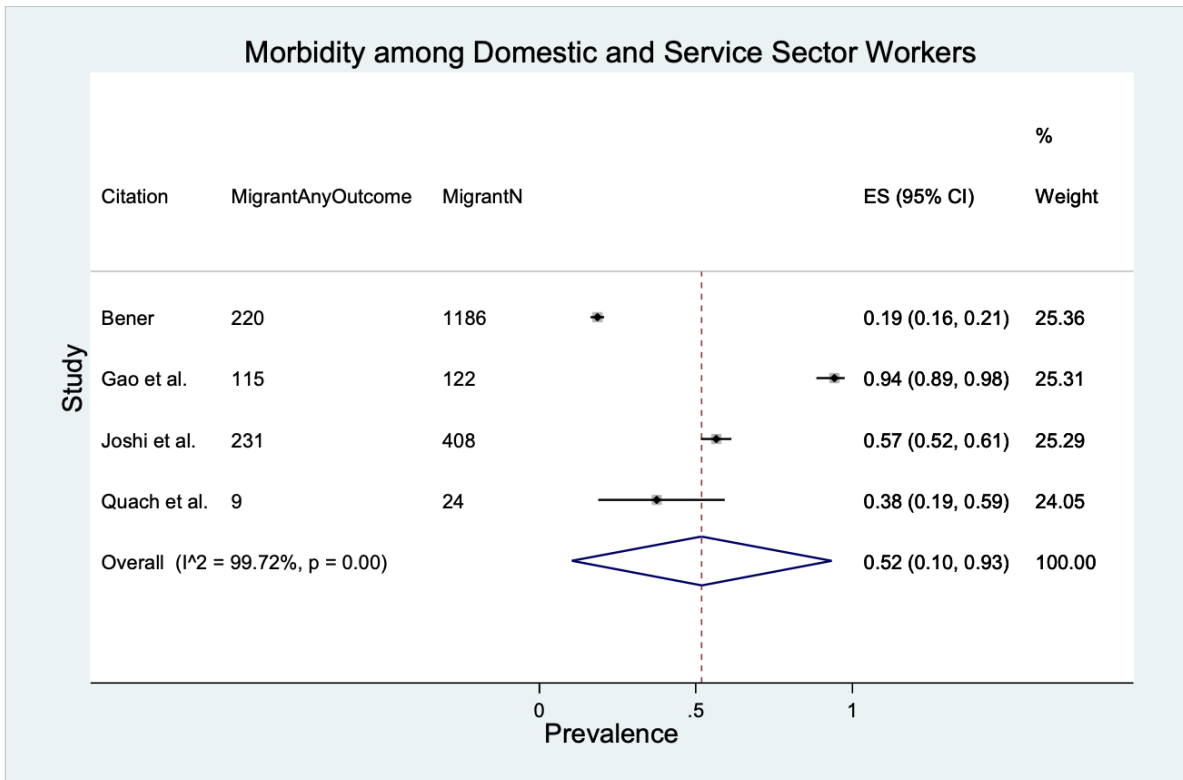

Supplementary Figure 2. Forest plot: Prevalence of morbidity among international migrant domestic and service sector workers

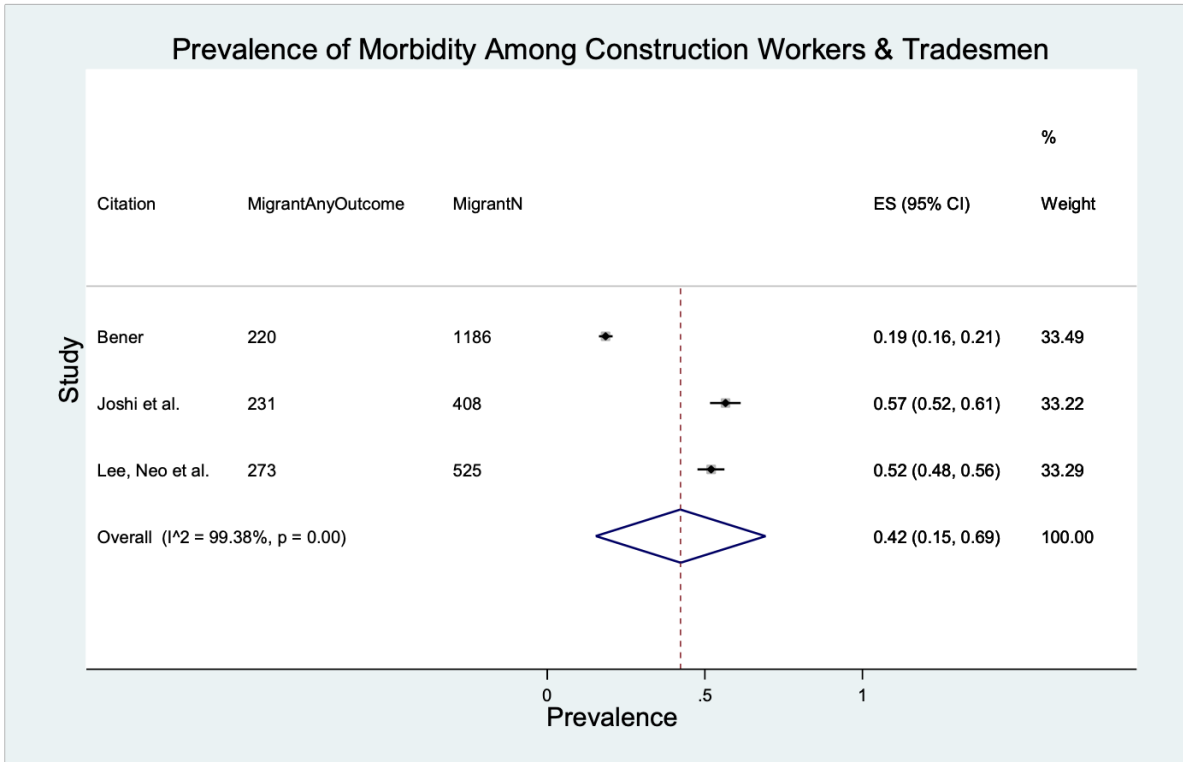

Supplementary Figure 3. Forest plot: Prevalence of morbidity among international migrant trade and construction workers

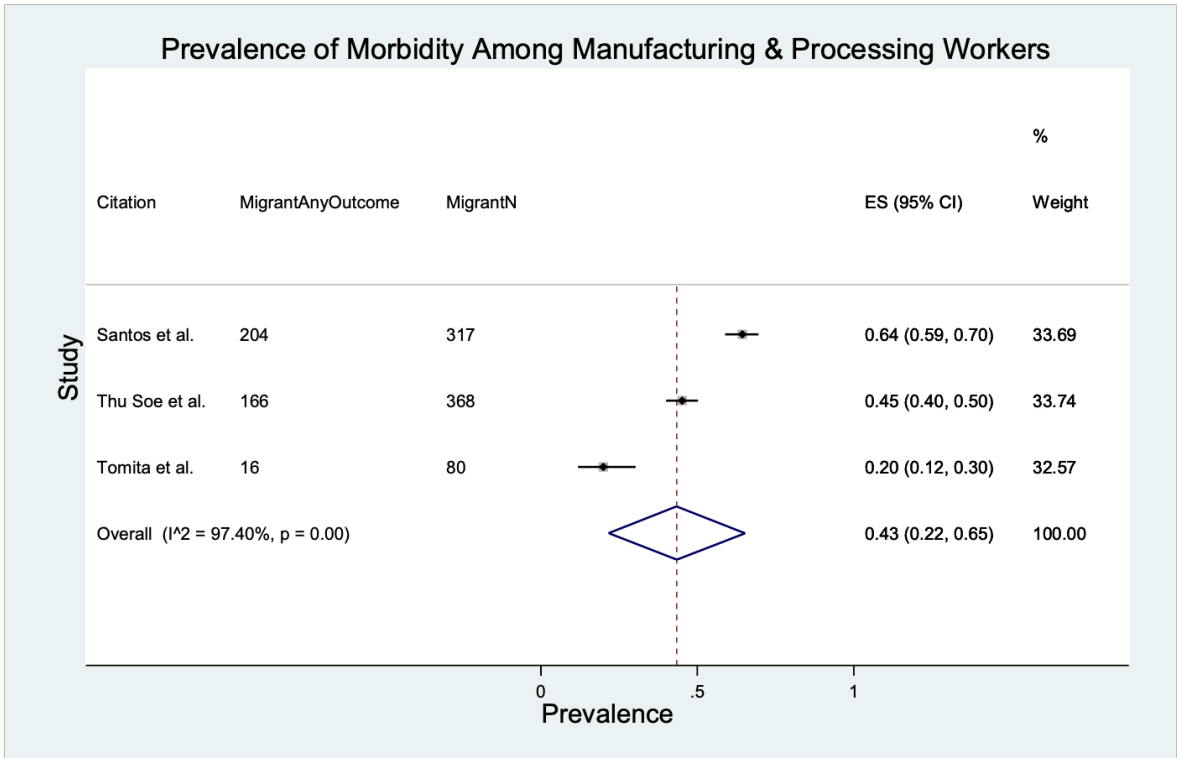

Supplementary Figure 4. Forest plot: Prevalence of morbidity among international migrant manufacturing and processing workers

### Prevalence of Morbidity Among Migrant Workers

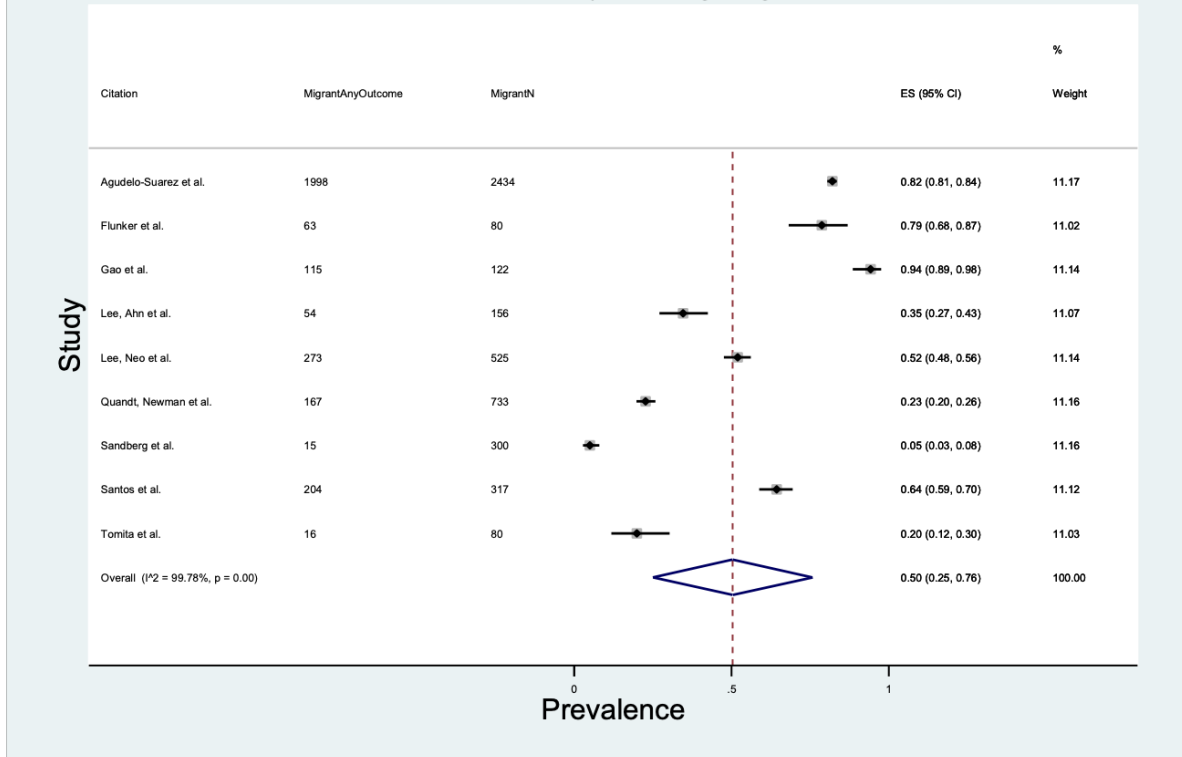

Supplementary Figure 5. Forest plot: Sensitivity analysis of prevalence of morbidity among international migrant workers

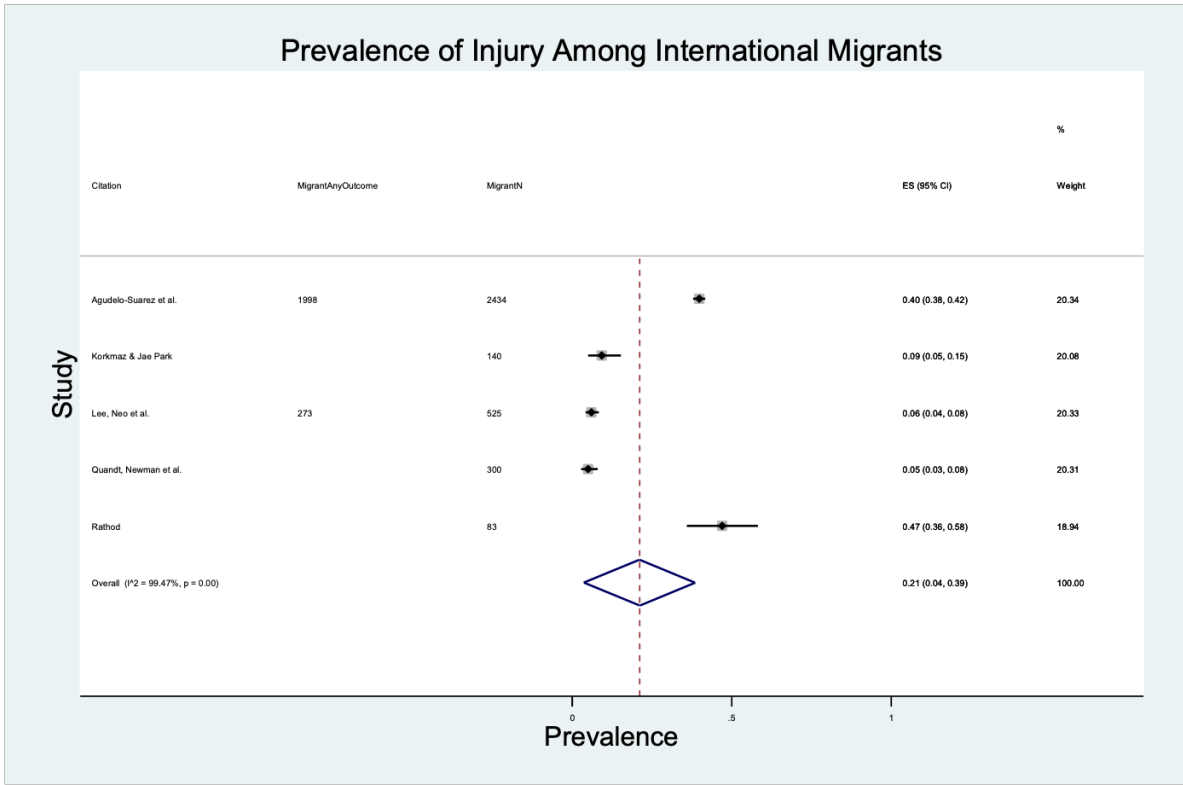

Supplementary Figure 6. Forest plot: Sensitivity analysis of prevalence of injury among international migrant workers



## Appendix 2. Search Strategy

### \*keywords only, not MESH

1. Labor migrat\* OR migrant work\* OR (foreign\* OR non-native OR transient OR migrant)adj2(work\*) OR foreign-work\* OR immigrant work\* OR economic migrat\* OR economic immigrat\* OR traffick\*

AND

2. (Occupation\* OR work\* OR employ\* OR industr\* OR minin\* OR quarrying OR forestr\* OR rubber plantation\* OR plantation\* OR palm oil OR fisher\* OR fishing OR manufacturing OR retail\* OR construction OR agricultur\* OR farm\* OR brick kiln\* OR domestic work\*)adj3(health OR injur\* OR disease\* OR hazard\* OR exposure\* OR accident\* OR hygiene OR safety OR medicine OR trauma\* OR fatalit\* OR death\* OR ill\* OR syndrom\* OR wound\* OR fatigue OR risk\* OR exposure OR safety OR disabilit\* OR morbidit\* or mortalit\* OR homicid\* OR infect\* OR disorder\* OR pain\* OR ache\*)

OR

3. (Occupation\* OR work\* OR employ\* OR industr\* OR minin\* OR quarrying OR forestr\* OR rubber plantation\* OR plantation\* OR palm oil OR fisher\* OR fishing OR manufacturing OR retail\* OR construction OR agricultur\* OR farm\* OR brick kiln\* OR domestic work\*)adj3(respirat\* OR musculoskeletal OR cardiovascular OR cancer\* OR hypertensi\* OR chronic OR obstructive OR hearing loss\* OR dermat\* OR allerg\* OR repetitive injur\* OR silicosis OR pneumoconiosis OR puncture\* OR laceration OR electrocution\* OR fall\* OR drowning OR pneumonia OR exhaustion OR broken bone\* OR toxic\* OR poison\* OR puncture OR burn\* OR parasite\* OR tendon\* OR pesticide\* OR insecticide OR dehydration OR ocular OR eye\* OR asthma OR bronchitis OR pulmonary)

OR

4. (Occupation\* OR work\* OR employ\* OR industr\* OR minin\* OR quarrying OR forestr\* OR rubber plantation\* OR plantation\* OR palm oil OR fisher\* OR fishing OR manufacturing OR retail\* OR construction OR agricultur\* OR farm\* OR brick kiln\* OR domestic work\*)adj3(mental\* OR psychosocial OR neurotic OR mood)adj3(problem\* OR disorder\* OR ill\* OR health OR stress\* OR wellbeing OR well-being)

5. (Occupation\* OR work\* OR employ\* OR industr\* OR minin\* OR quarrying OR forestr\* OR rubber plantation\* OR plantation\* OR palm oil OR fisher\* OR fishing OR manufacturing OR retail\* OR construction OR agricultur\* OR farm\* OR brick kiln\* OR domestic work\*)adj3(anxiety OR depress\* OR psychiatric OR bipolar OR psychos\* OR schizophren\* OR fear OR guilt OR hostile\* OR shame OR suicid\*)

NOT

5. Sexual health OR sexually transmitted disease\* OR sexually transmitted infection\* OR molecu\* OR membrane\* OR cell\* OR protein\* OR sex-traffick\* OR sex traffick\* OR sex work\*
